# Supplementary material for: Enhancing the Deposition Rate and Uniformity in 3D Gold Microelectrode Arrays via Ultrasonic-Enhanced Template-Assisted Electrodeposition
Source: MDPI journal article supplement (doi:10.3390/s24041251), 2024-02-15

■ M1>MEA\_Layout\_Cr/Au      □ Grid Layer      ▨ M2>Passivation\_Layout\_SiOx  
■ M1>Scribe\_Line\_Cr/Au      ▩ M3>Template\_Layout\_KMPR

-7750.000    Major tick=10000 Minor tick=500 (UM)    7750.000

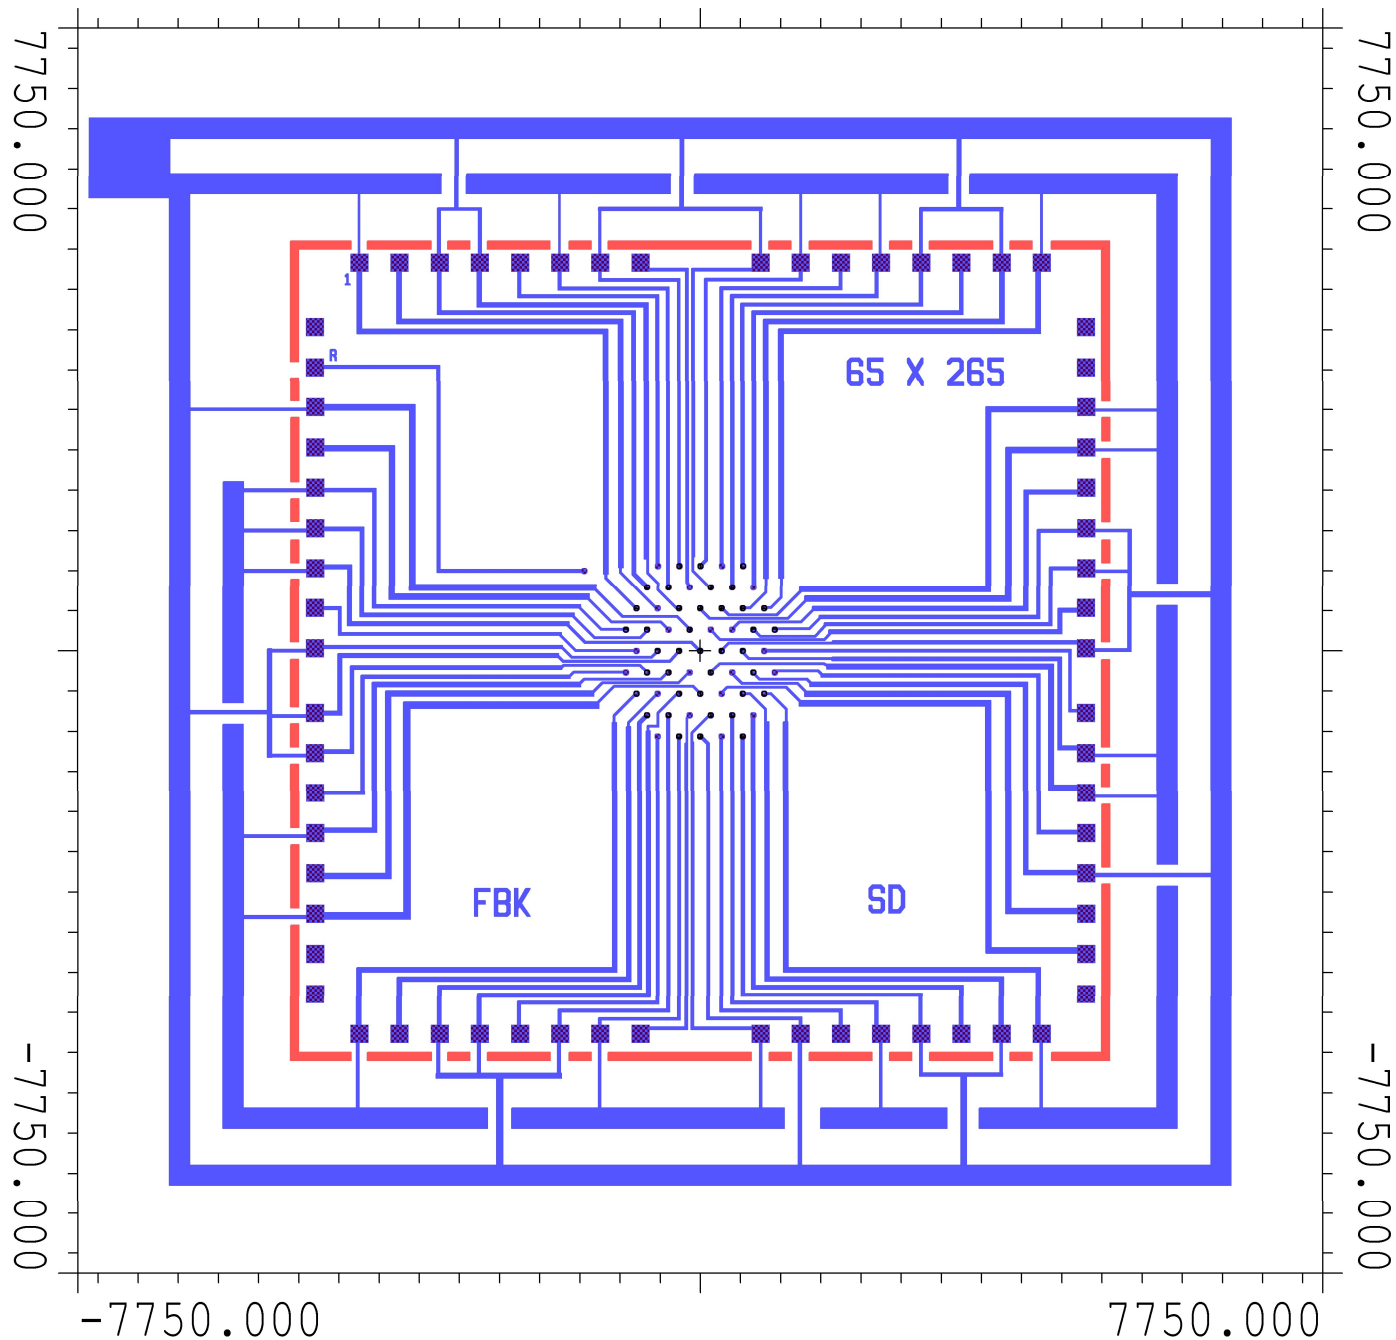

Supplement: s1 [file s1]
